# Supplementary material for: Structural basis for human sterol isomerase in cholesterol biosynthesis and multidrug recognition
Source: PubMed Central journal article supplement (PMC6549186; doi:10.1038/s41467-019-10279-w), 2019-06-05
Supplement: 41467_2019_10279_MOESM1_ESM.pdf [file 41467_2019_10279_MOESM1_ESM.pdf]

**Structural basis for human sterol isomerase in cholesterol  
biosynthesis and multidrug recognition**

**Tao Long, Abdirahman Hassan, Bonne M Thompson, Jeffrey G McDonald,  
Jiawei Wang and Xiaochun Li**

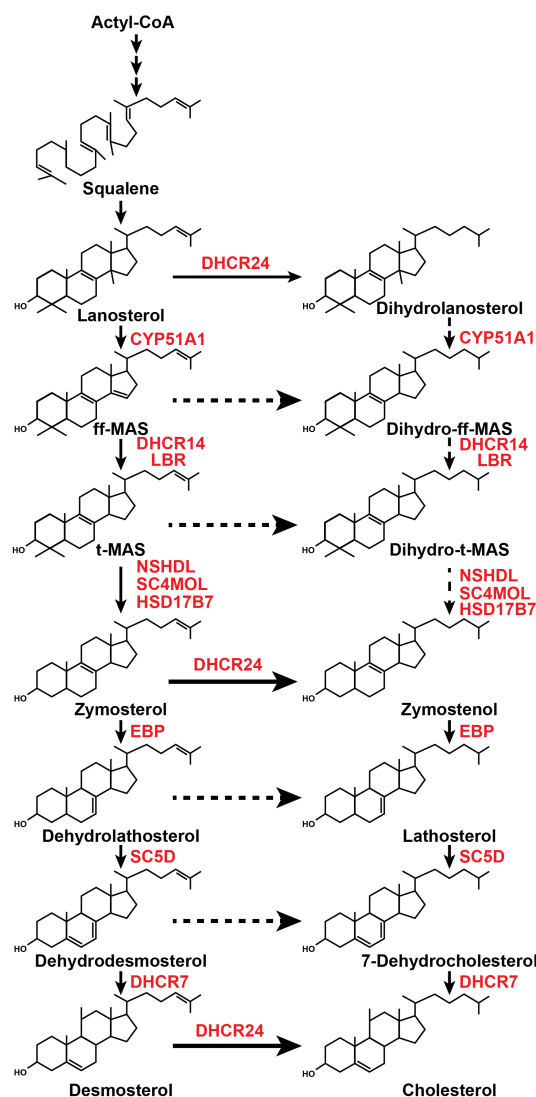

**Supplementary Figure 1 Cholesterol biosynthesis pathway and membrane enzymes.**

Acetyl-CoA is the precursor for cholesterol biosynthesis. After several reactions, the intermediate lanosterol is synthesized. Conversion of lanosterol to cholesterol involves many reactions catalyzed by membrane enzymes (red). The left lane denotes the Bloch pathway; the right lane denotes the Kandutsch-Russell pathway. 24,25-double bond desaturation can occur at any step between lanosterol and desmosterol in this pathway, but in most tissues desaturation does not occur until after demethylation is complete (after t-MAS)<sup>1</sup>.

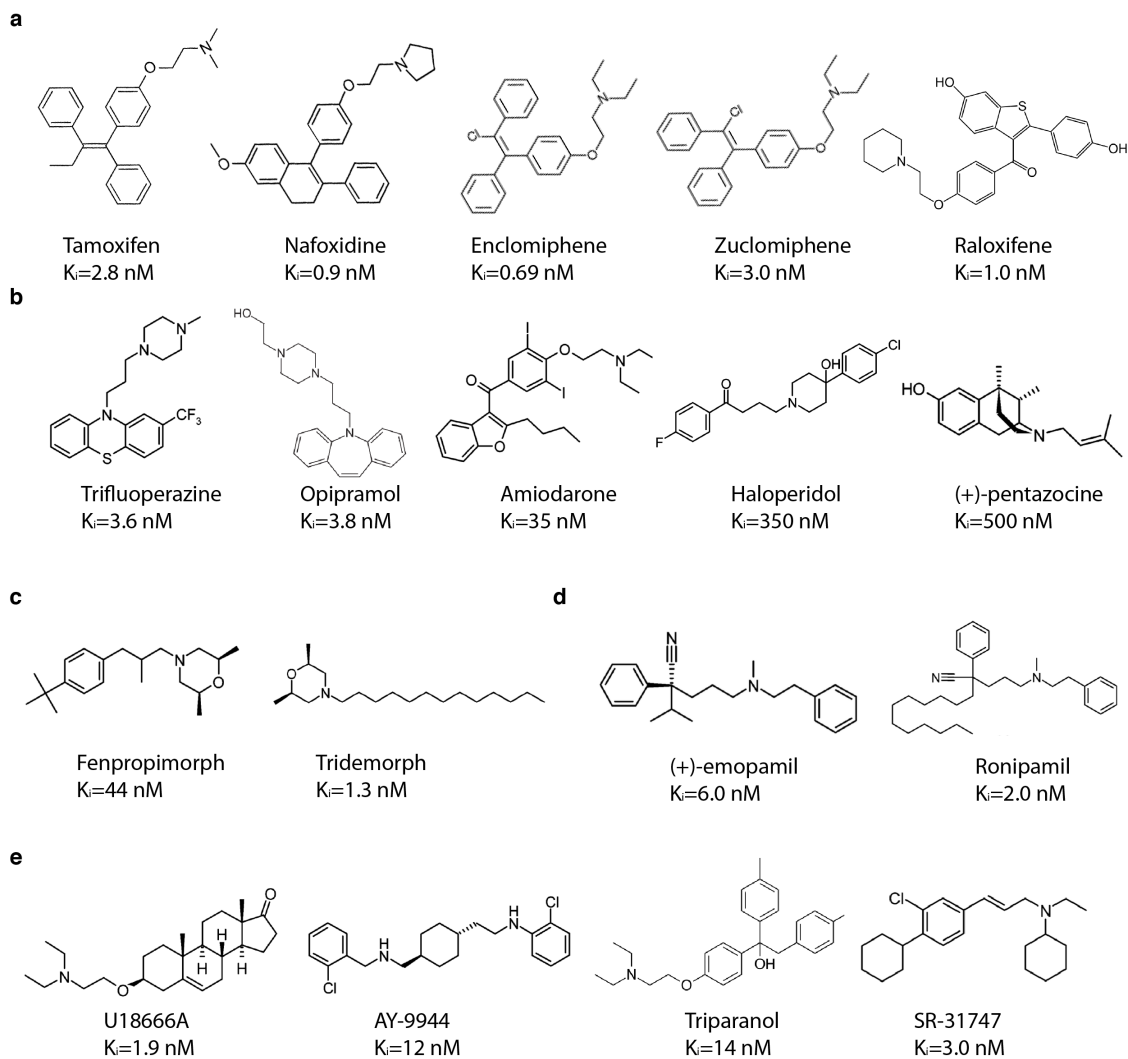

**Supplementary Figure 2 Summary of pharmacologically active compounds that bind to human EBP protein.**

**a**, Anti-tumor drugs. **b**, Neuroprotective drugs. **c**, Fungicides. **d**, Calcium channel blockers. **e**, Sterol biosynthesis inhibitors.  $K_i$  values are from the previous reports <sup>2,3</sup>.

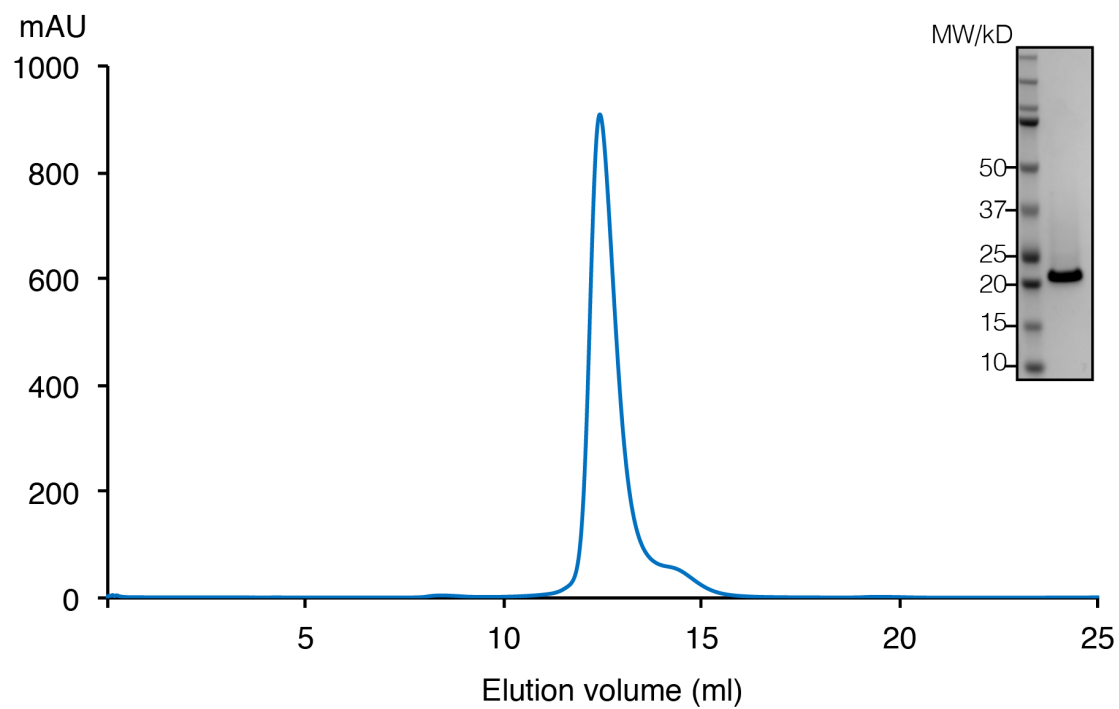

**Supplementary Figure 3 Expression and purification of human EBP protein.**

Representative Superdex 200 increase 10/30 gel-filtration chromatogram of human EBP.

Peak fraction of human EBP is shown on SDS-PAGE with molecular markers.

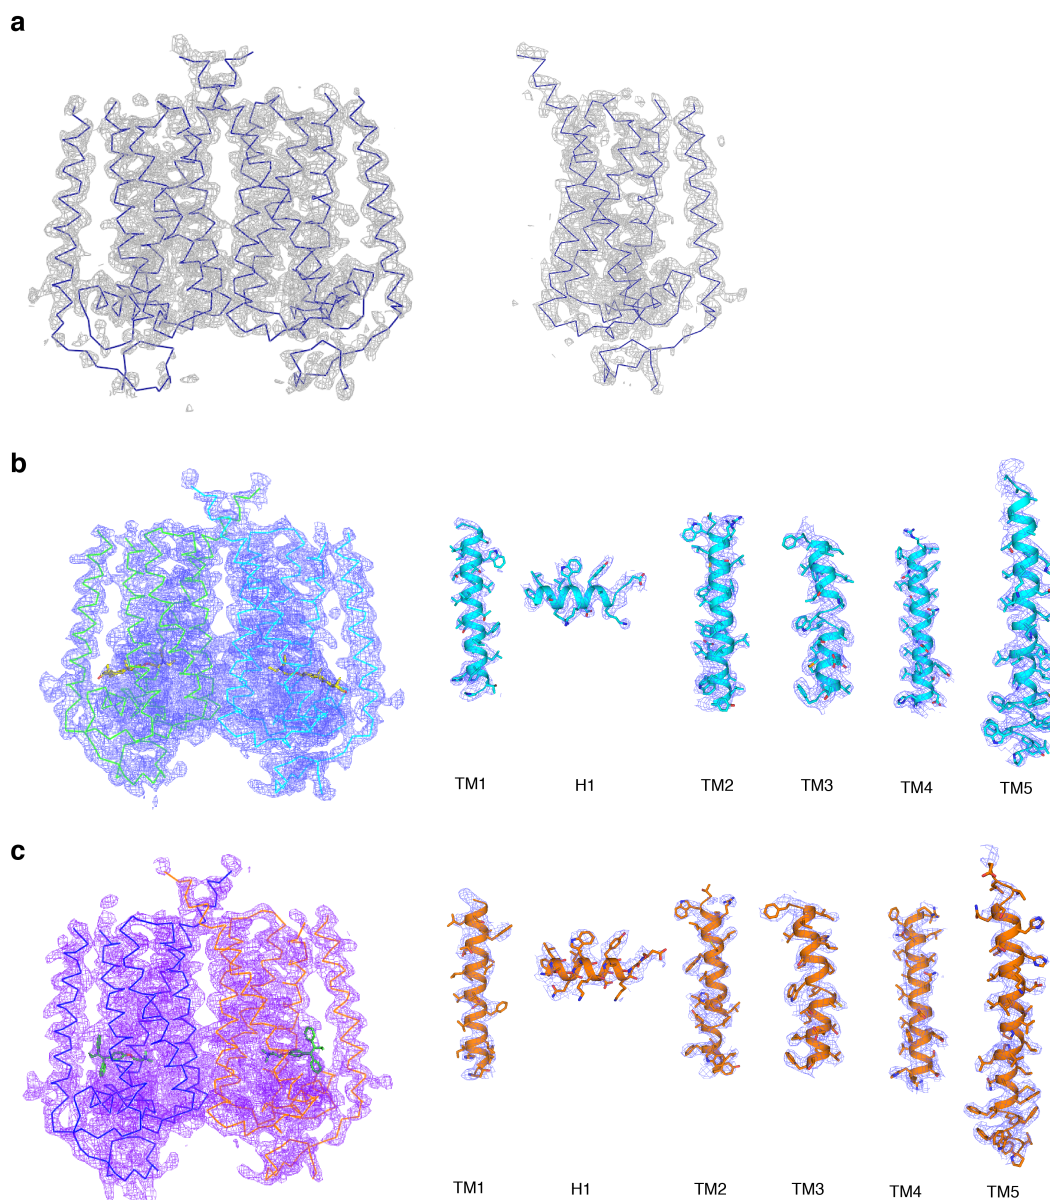

**Supplementary Figure 4 The  $2F_o-F_c$  electron density of EBP.**

**a**, An overall view of the experimental electron density, contoured at  $1.5 \sigma$ , in one unit cell. **b**, The  $2F_o-F_c$  electron density map of EBP with U18666A, contoured at  $1.0 \sigma$ . An overall view of the EBP dimer is shown (left). A representative view of the helices of Molecule A is shown (right). **c**, The  $2F_o-F_c$  electron density map of EBP with tamoxifen, contoured at  $1.0 \sigma$ . An overall view of the EBP dimer is shown (left). A representative view of the helices of Molecule A is shown (right).

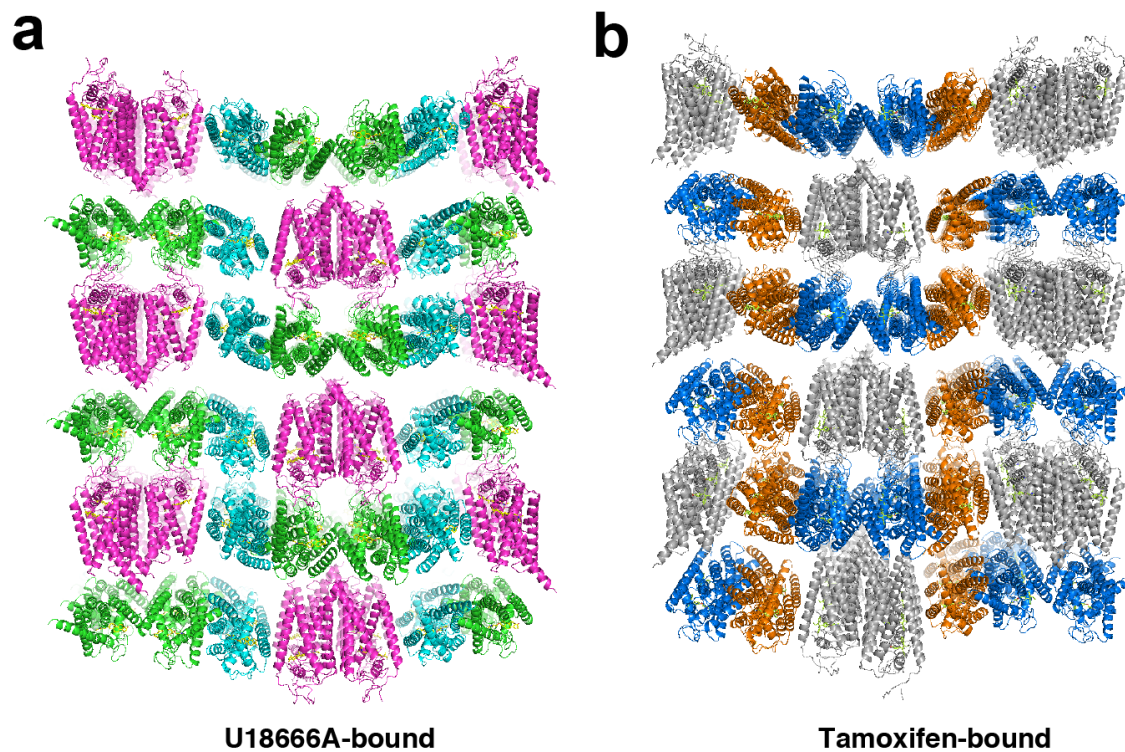

**Supplementary Figure 5 Crystal packing of human EBP protein.**

**a**, EBP with U18666A. **b**, EBP with tamoxifen. The three molecules of EBP protein in an asymmetric unit are indicated in the different colors.

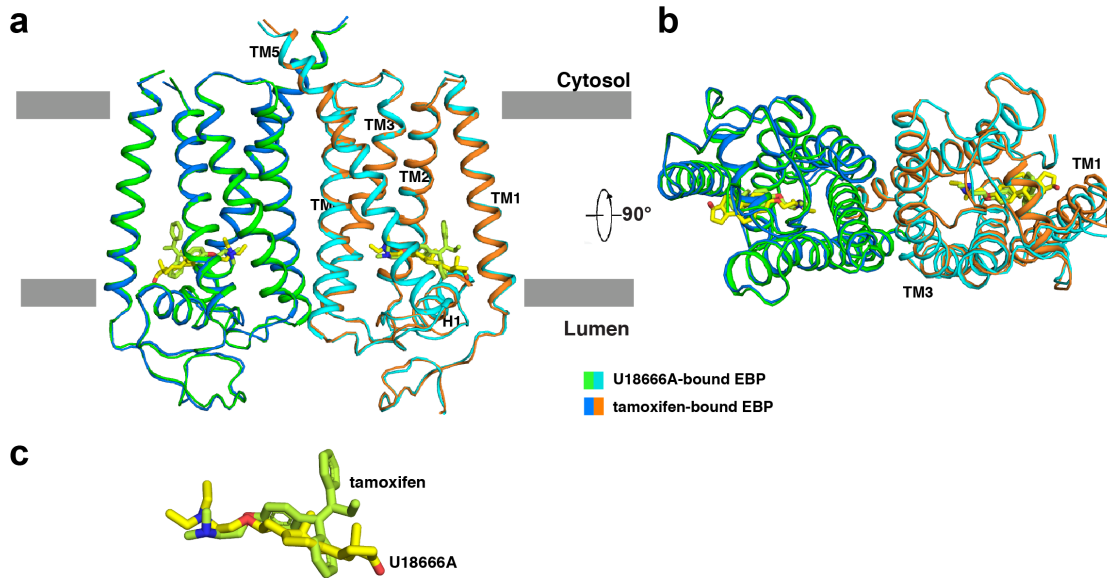

**Supplementary Figure 6 Structural comparison of U18666A-bound and tamoxifen-bound EBP.**

**a**, Structural comparison from parallel to the membrane view. **b**, Structural comparison from lumen view. **c**, The comparison of U18666A and tamoxifen in the structures.

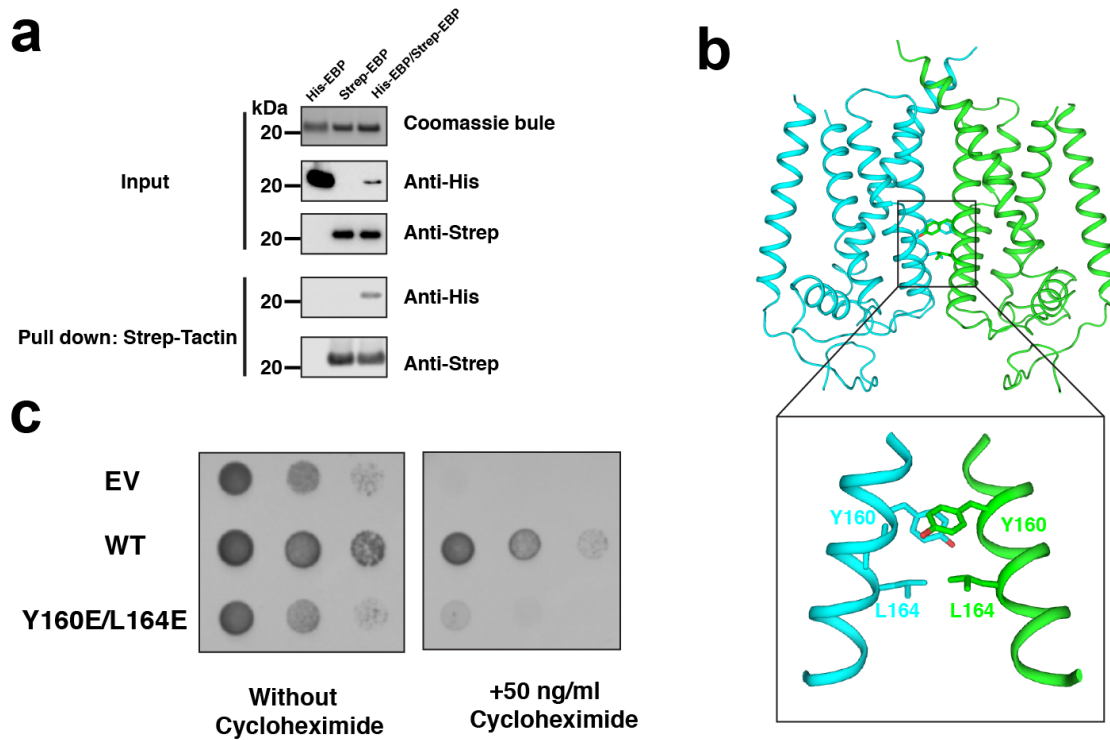

### Supplementary Figure 7 Physiological function of EBP dimer

**a**, The EBP dimer is verified by pull down assay. Protein with both His and Strep tag was expressed by cells which were co-infected with two baculoviruses (see Methods) and purified by Strep-Tactin affinity column. **b**, The dimer interface of EBP. The key residues that form the interface are shown as sticks. **c**, Yeast complementation assay. EBP with dimerization mutations can rescue the growth of  $\Delta$ Erg2 *Saccharomyces cerevisiae*, but these mutants are not as efficient as WT. Growth of yeast expressing EBP mutant in the presence of 50 ng/ml concentrations of cycloheximide for 24 to 48 hours. Source data are provided as a Source Data file.



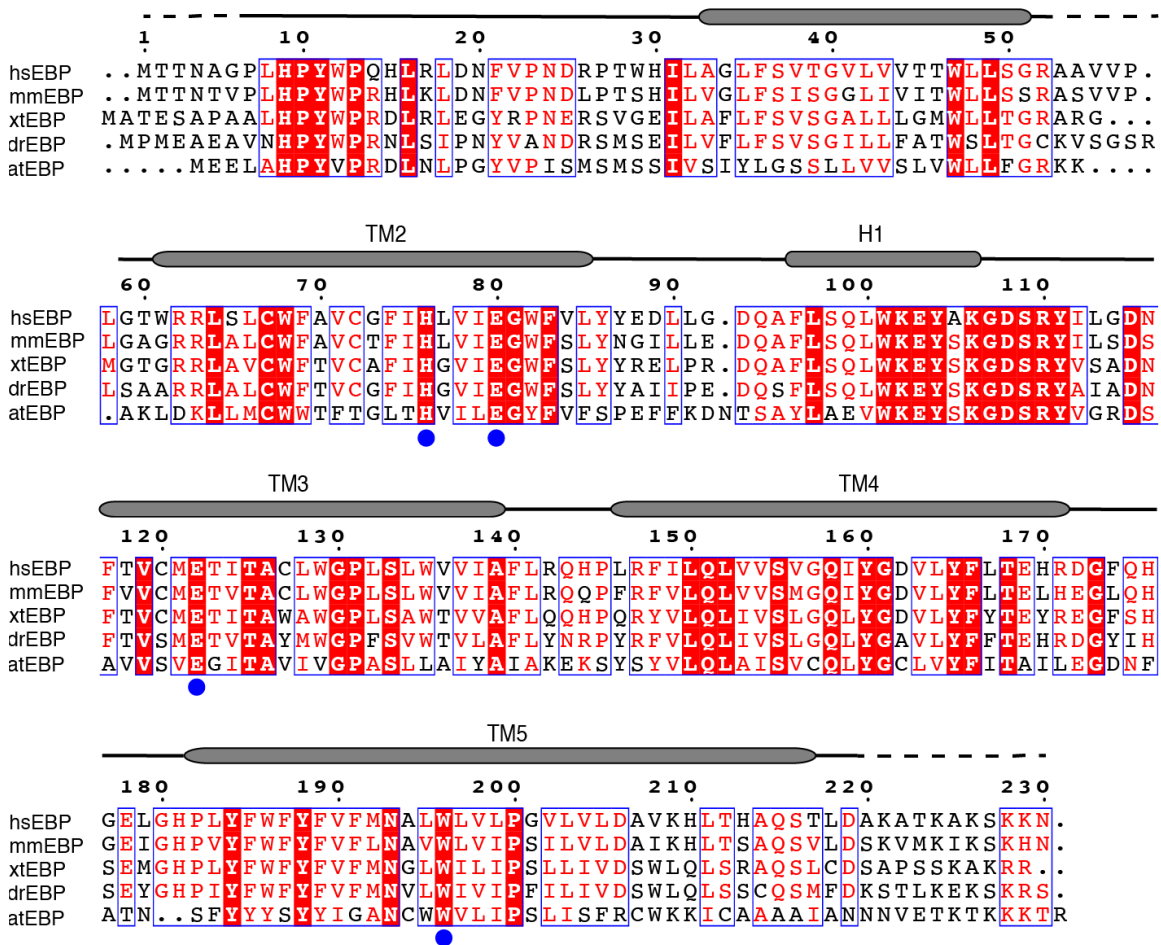

**Supplementary Figure 8** Sequence alignment of human EBP protein with different species EBP proteins. The residue numbers of hsEBP are indicated above the protein sequence. The secondary structures are labeled. Residues under the dashed lines are excluded from the 3D reconstruction. The catalytic residues for the reaction are indicated by blue balls. Species label: hs-*Homo sapiens*; mm-*Mus musculus*; xt-*Xenopus tropicalis*; dr-*Danio rerio*; at-*Arabidopsis thaliana*.

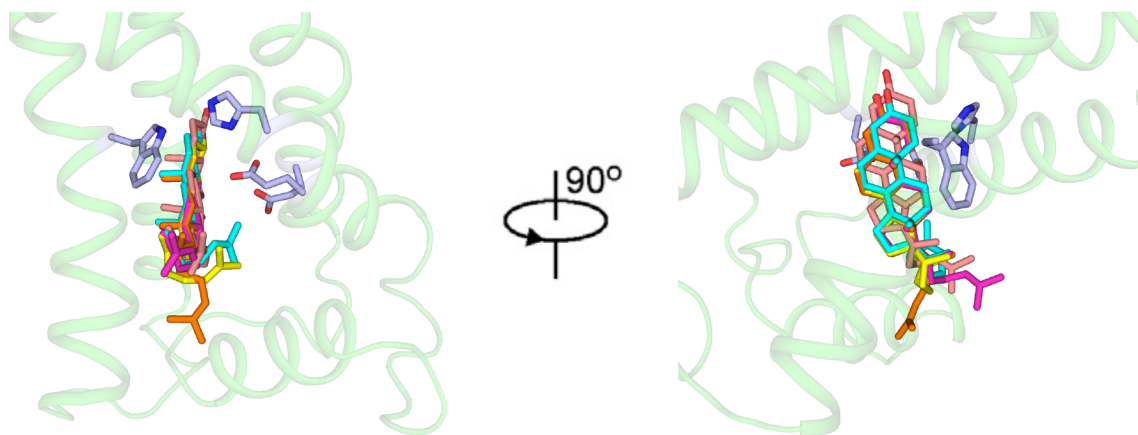

**Supplementary Figure 9 Molecular Docking Simulations for binding of  $\Delta^8$ -sterol to EBP.**

The top 5 scoring poses of  $\Delta^8$ -sterol bound to EBP are overlaid with key residues represented as sticks (light blue). Color: pose 1, orange; pose 2, cyan; pose 3, magenta; pose 4, yellow; pose 5, wheat.

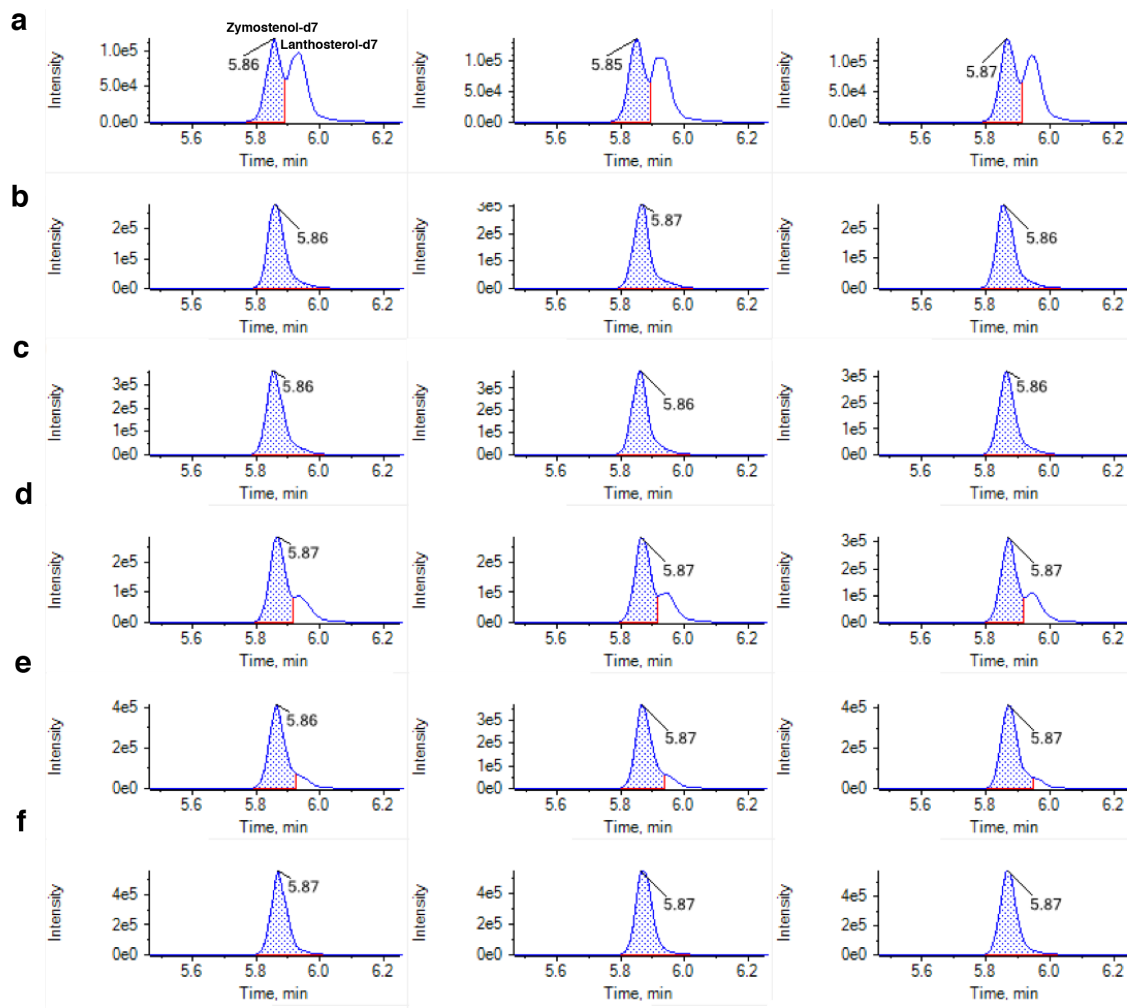

**Supplementary Figure 10 LC-MS/MS chromatography of EBP activity assays.**

**a**, wild type. **b**, mutant with H76A. **c**, mutant with E80A. **d**, mutant with E122A. **e**, mutant with W196A. **f**, No protein. The peak of the precursor, deuterium labeled zymostenol, is colored in blue; the peak of the product, lanthosterol, is colored in white. LC-MS/MS results with three independent repeats.

**Supplementary Table 1. Data collection, phasing and refinement statistics**

|                                                     | U18666A-bound<br>(Se-labeled)            | Tamoxifen-bound<br>(Native form)         | Se-SAD                                   |
|-----------------------------------------------------|------------------------------------------|------------------------------------------|------------------------------------------|
| <b>Data collection</b>                              |                                          |                                          |                                          |
| Space group                                         | <i>P</i> 2 <sub>1</sub> 2 <sub>1</sub> 2 | <i>P</i> 2 <sub>1</sub> 2 <sub>1</sub> 2 | <i>P</i> 2 <sub>1</sub> 2 <sub>1</sub> 2 |
| Cell dimensions                                     |                                          |                                          |                                          |
| <i>a</i> , <i>b</i> , <i>c</i> (Å)                  | 194.566, 67.823,<br>96.858               | 192.837, 66.829,<br>98.678               | 194.338, 67.923,<br>99.731               |
| $\alpha$ , $\beta$ , $\gamma$ (°)                   | 90, 90, 90                               | 90, 90, 90                               | 90, 90, 90                               |
| Wavelength                                          | 0.97927                                  | 0.97927                                  | <u>0.97910</u>                           |
| Resolution (Å)                                      | 50~3.15 (3.26~3.15)                      | 50~3.45 (3.51~3.45)                      | 50~3.50 (3.63~3.50)                      |
| <i>R</i> <sub>merge</sub> (%)                       | 8.6 (>1)                                 | 11.7 (>1)                                | 13.2 (>1)                                |
| <i>I</i> / $\sigma$ <i>I</i>                        | 30.0 (1.2)                               | 17.3 (1.0)                               | 21.1 (1.3)                               |
| Completeness (%)                                    | 99.8 (99.6)                              | 99.6 (99.7)                              | 99.6 (99.8)                              |
| Redundancy                                          | 12.9 (11.9)                              | 6.3 (5.7)                                | 43.5 (30.1)                              |
| <b>Refinement</b>                                   |                                          |                                          |                                          |
| Resolution (Å)                                      | 50~3.20                                  | 50~3.50                                  |                                          |
| No. reflections                                     | 28389                                    | 13685                                    |                                          |
| <i>R</i> <sub>work</sub> / <i>R</i> <sub>free</sub> | 26.85 / 31.91                            | 27.25 / 32.59                            |                                          |
| No. atoms                                           | 5208                                     | 5208                                     |                                          |
| Protein                                             | 5124                                     | 5124                                     |                                          |
| Ligand/ion                                          | 84                                       | 84                                       |                                          |
| Water                                               | 0                                        | 0                                        |                                          |
| <i>B</i> -factors                                   |                                          |                                          |                                          |
| Protein                                             | 56.30                                    | 35.37                                    |                                          |
| Ligand/ion                                          | 61.35                                    | 36.32                                    |                                          |
| Water                                               | N/A                                      | N/A                                      |                                          |
| R.m.s deviations                                    |                                          |                                          |                                          |
| Bond lengths (Å)                                    | 0.004                                    | 0.004                                    |                                          |
| Bond angles (°)                                     | 0.927                                    | 0.927                                    |                                          |

Values in parentheses are for the highest resolution shell. *R*<sub>free</sub> was calculated with 5% of the reflections selected in the thin shell.

**Supplementary Table 2. Disease-related mutations and their probably effect and consequence.**

| Mutation               | Probably effect         | Likely consequence                              |
|------------------------|-------------------------|-------------------------------------------------|
| L18P <sup>4</sup>      | Block the solvent entry | Non-functional protein                          |
| W47C <sup>5</sup>      | To be determined        | Unknown                                         |
| W47R <sup>6</sup>      | To be determined        | Unknown                                         |
| R62W <sup>7</sup>      | To be determined        | Unknown                                         |
| L66P <sup>8</sup>      | To be determined        | Unknown                                         |
| C72R <sup>9</sup>      | Sterol binding /entry   | Non-functional protein                          |
| C72Y <sup>7</sup>      | Sterol binding /entry   | Non-functional protein                          |
| G73E <sup>9</sup>      | Sterol binding /entry   | Non-functional protein                          |
| I75N <sup>10,11</sup>  | Sterol binding /entry   | Non-functional protein                          |
| E80K <sup>12,13</sup>  | Catalytic activity      | Non-functional protein                          |
| W82C <sup>14,15</sup>  | Sterol binding /entry   | Non-functional protein                          |
| L100P <sup>9</sup>     | Sterol binding /entry   | Non-functional protein                          |
| W101C <sup>9</sup>     | Sterol binding /entry   | Non-functional protein                          |
| E103K <sup>16</sup>    | Block the solvent entry | Non-functional protein                          |
| Y104H <sup>9</sup>     | Sterol binding /entry   | Non-functional protein                          |
| Y104C <sup>9</sup>     | Sterol binding /entry   | Non-functional protein                          |
| A105D <sup>9</sup>     | Block the solvent entry | Non-functional protein                          |
| G107E <sup>9</sup>     | Block the solvent entry | Non-functional protein                          |
| R110Q <sup>16,17</sup> | Block the solvent entry | Non-functional protein                          |
| Y111H <sup>9</sup>     | Sterol binding /entry   | Non-functional protein                          |
| G130V <sup>7</sup>     | Sterol binding /entry   | Non-functional protein                          |
| S133R <sup>8,13</sup>  | To be determined        | Unknown                                         |
| F140C <sup>9</sup>     | To be determined        | Unknown                                         |
| R147C <sup>9</sup>     | To be determined        | Unknown                                         |
| R147H <sup>14-16</sup> | To be determined        | Unknown                                         |
| G157S <sup>7</sup>     | Dimerization            | Destabilize the protein or cause folding defect |
| G161R <sup>9</sup>     | Dimerization            | Destabilize the protein or cause folding defect |
| D162H <sup>8</sup>     | Sterol binding /entry   | Non-functional protein                          |
| L164P <sup>16</sup>    | Dimerization            | Destabilize the protein or cause folding defect |
| Y165C <sup>14</sup>    | Sterol binding /entry   | Non-functional protein                          |
| R171C <sup>9</sup>     | Dimerization            | Destabilize the protein or cause folding defect |
| R171H <sup>9</sup>     | Dimerization            | Destabilize the protein or cause folding defect |
| G173R <sup>7</sup>     | To be determined        | Unknown                                         |
| H176R <sup>9</sup>     | To be determined        | Unknown                                         |
| W196S <sup>7</sup>     | Sterol binding /entry   | Non-functional protein                          |
| L203P <sup>15</sup>    | To be determined        | Unknown                                         |

|                    |              |                                                 |
|--------------------|--------------|-------------------------------------------------|
| L211R <sup>9</sup> | Dimerization | Destabilize the protein or cause folding defect |
| T217M <sup>9</sup> | Dimerization | Destabilize the protein or cause folding defect |

**Supplementary Table 3. Lists of primers used in this study.**

| <b>Primer name</b>      | <b>Sequences (5' – 3')</b>                                 |
|-------------------------|------------------------------------------------------------|
| EBP_Strep_Forward       | AATGAATTCATGTGGTCACATCCGCAGTTCGAGAAAA<br>CTACCAACGCGGGCCCC |
| EBP_Flag_Forward        | CGCGGATCC GACTACAAAGACGATGACGACAAGACTA<br>CCAACGCGGGCCCC   |
| EBP_His_Forward         | AATGAATTCATGCACCACCACCACCACCACCACCACAC<br>TACCAACGCGGGCCCC |
| EBP_Reverse             | AATGCGGCCGCTCAGTTCTTCTTGCTCTTGGC                           |
| EBP_H76A_Forward        | GTGTGTGGGTTTATTGCCCTGGTGATCGAGGGC                          |
| EBP_H76A_Reverse        | GCCCTCGATCACCAGGGCAATGAACCCACACAC                          |
| EBP_E80A_Forward        | ATTCACCTGGTGATCGCGGGCTGGTTCGTTCTC                          |
| EBP_E80A_Reverse        | GAGAACGAACCAGCCC GCGATCACCAGGTGAAT                         |
| EBP_E122A_Forward       | TTCACAGTGTGCATGGCAACCATCACAGCTTGC                          |
| EBP_E122A_Reverse       | GCAAGCTGTGATGGTTGCCATGCACACTGTGAA                          |
| EBP_N193A_Forward       | TACTTTGTCTTCATGGCTGCCCTGTGGCTGGTG                          |
| EBP_N193A_Reverse       | CACCAGCCACAGGGCAGCCATGAAGACAAAGTA                          |
| EBP_W196A_Forward       | TTCATGAATGCCCTGGCGCTGGTGCTGCCTGGA                          |
| EBP_W196A_Reverse       | TCCAGGCAGCACCAGCGCCAGGGCATTTCATGAA                         |
| EBP_Y160E/L164E_Forward | TCTGTGGGCCAGATCGAGGGGGATGTGGAGTACTTCCT<br>GACAGAG          |
| EBP_Y160E/L164E_Reverse | CTCTGTCAGGAAGTACTCCACATCCCCCTCGATCTGGCC<br>CACAGA          |

**References:**

- 1 Mitsche, M. A., McDonald, J. G., Hobbs, H. H. & Cohen, J. C. Flux analysis of cholesterol biosynthesis in vivo reveals multiple tissue and cell-type specific pathways. *eLife* **4**, e07999, doi:10.7554/eLife.07999 (2015).
- 2 Laggner, C. *et al.* Discovery of high-affinity ligands of sigma1 receptor, ERG2, and emopamil binding protein by pharmacophore modeling and virtual screening. *Journal of medicinal chemistry* **48**, 4754-4764, doi:10.1021/jm049073+ (2005).
- 3 Moebius, F. F. *et al.* Pharmacological analysis of sterol delta8-delta7 isomerase proteins with [3H]ifenprodil. *Molecular pharmacology* **54**, 591-598 (1998).
- 4 Milunsky, J. M., Maher, T. A. & Metzenberg, A. B. Molecular, biochemical, and phenotypic analysis of a hemizygous male with a severe atypical phenotype for X-linked dominant Conradi-Hunermann-Happle syndrome and a mutation in EBP. *American journal of medical genetics. Part A* **116a**, 249-254, doi:10.1002/ajmg.a.10849 (2003).
- 5 Furtado, L. V. *et al.* A novel X-linked multiple congenital anomaly syndrome associated with an EBP mutation. *American journal of medical genetics. Part A* **152a**, 2838-2844, doi:10.1002/ajmg.a.33674 (2010).
- 6 Hartill, V. L. *et al.* An unusual phenotype of X-linked developmental delay and extreme behavioral difficulties associated with a mutation in the EBP gene. *American journal of medical genetics. Part A* **164a**, 907-914, doi:10.1002/ajmg.a.36368 (2014).
- 7 Herman, G. E. *et al.* Characterization of mutations in 22 females with X-linked dominant chondrodysplasia punctata (Happle syndrome). *Genetics in medicine : official journal of the American College of Medical Genetics* **4**, 434-438, doi:10.1097/00125817-200211000-00006 (2002).
- 8 Whittock, N. V. *et al.* Novel mutations in X-linked dominant chondrodysplasia punctata (CDPX2). *The Journal of investigative dermatology* **121**, 939-942, doi:10.1046/j.1523-1747.2003.12489.x (2003).
- 9 Landrum, M. J. *et al.* ClinVar: improving access to variant interpretations and supporting evidence. *Nucleic acids research* **46**, D1062-d1067, doi:10.1093/nar/gkx1153 (2018).
- 10 Barboza-Cerda, M. C., Wong, L. J., Martinez-de-Villarreal, L. E., Zhang, V. W. & Dector, M. A. A novel EBP c.224T>A mutation supports the existence of a male-specific disorder independent of CDPX2. *American journal of medical genetics. Part A* **164a**, 1642-1647, doi:10.1002/ajmg.a.36508 (2014).
- 11 Barboza-Cerda, M. C., Campos-Acevedo, L. D., Rangel, R., Martinez-de-Villarreal, L. E. & Dector, M. A. A novel phenotype characterized by digital abnormalities, intellectual disability, and short stature in a Mexican family maps to Xp11.4-p11.21. *American journal of medical genetics. Part A* **161a**, 237-243, doi:10.1002/ajmg.a.35743 (2013).
- 12 Aughton, D. J., Kelley, R. I., Metzenberg, A., Pureza, V. & Pauli, R. M. X-linked dominant chondrodysplasia punctata (CDPX2) caused by single gene mosaicism in a male. *American journal of medical genetics. Part A* **116a**, 255-260, doi:10.1002/ajmg.a.10852 (2003).



- 13 Braverman, N. *et al.* Mutations in the gene encoding 3 beta-hydroxysteroid-delta 8, delta 7-isomerase cause X-linked dominant Conradi-Hunermann syndrome. *Nature genetics* **22**, 291-294, doi:10.1038/10357 (1999).
- 14 Shirahama, S. *et al.* Skewed X-chromosome inactivation causes intra-familial phenotypic variation of an EBP mutation in a family with X-linked dominant chondrodysplasia punctata. *Human genetics* **112**, 78-83, doi:10.1007/s00439-002-0844-x (2003).
- 15 Has, C. *et al.* Gas chromatography-mass spectrometry and molecular genetic studies in families with the Conradi-Hunermann-Happle syndrome. *The Journal of investigative dermatology* **118**, 851-858, doi:10.1046/j.1523-1747.2002.01761.x (2002).
- 16 Canueto, J. *et al.* Clinical, molecular and biochemical characterization of nine Spanish families with Conradi-Hunermann-Happle syndrome: new insights into X-linked dominant chondrodysplasia punctata with a comprehensive review of the literature. *The British journal of dermatology* **166**, 830-838, doi:10.1111/j.1365-2133.2011.10756.x (2012).
- 17 Derry, J. M. *et al.* Mutations in a delta 8-delta 7 sterol isomerase in the tattered mouse and X-linked dominant chondrodysplasia punctata. jderry@immunex.com. *Nature genetics* **22**, 286-290, doi:10.1038/10350 (1999).
