# Supplementary material for: Structural basis for human sterol isomerase in cholesterol biosynthesis and multidrug recognition
Source: PubMed Central journal article supplement (PMC6549186; doi:10.1038/s41467-019-10279-w), 2019-06-05
Supplement: 41467_2019_10279_MOESM2_ESM.pdf [file 41467_2019_10279_MOESM2_ESM.pdf]

## Reporting Summary

Nature Research wishes to improve the reproducibility of the work that we publish. This form provides structure for consistency and transparency in reporting. For further information on Nature Research policies, see [Authors & Referees](#) and the [Editorial Policy Checklist](#).

### Statistics

For all statistical analyses, confirm that the following items are present in the figure legend, table legend, main text, or Methods section.

n/a Confirmed

- The exact sample size ( $n$ ) for each experimental group/condition, given as a discrete number and unit of measurement
- A statement on whether measurements were taken from distinct samples or whether the same sample was measured repeatedly
- The statistical test(s) used AND whether they are one- or two-sided  
*Only common tests should be described solely by name; describe more complex techniques in the Methods section.*
- A description of all covariates tested
- A description of any assumptions or corrections, such as tests of normality and adjustment for multiple comparisons
- A full description of the statistical parameters including central tendency (e.g. means) or other basic estimates (e.g. regression coefficient) AND variation (e.g. standard deviation) or associated estimates of uncertainty (e.g. confidence intervals)
- For null hypothesis testing, the test statistic (e.g.  $F$ ,  $t$ ,  $r$ ) with confidence intervals, effect sizes, degrees of freedom and  $P$  value noted  
*Give  $P$  values as exact values whenever suitable.*
- For Bayesian analysis, information on the choice of priors and Markov chain Monte Carlo settings
- For hierarchical and complex designs, identification of the appropriate level for tests and full reporting of outcomes
- Estimates of effect sizes (e.g. Cohen's  $d$ , Pearson's  $r$ ), indicating how they were calculated

*Our web collection on [statistics for biologists](#) contains articles on many of the points above.*

### Software and code

Policy information about [availability of computer code](#)

Data collection

HKL2000

Data analysis

Graphpad, Phenix, COOT, PyMOL, MolProbity, Maestro platform

For manuscripts utilizing custom algorithms or software that are central to the research but not yet described in published literature, software must be made available to editors/reviewers. We strongly encourage code deposition in a community repository (e.g. GitHub). See the Nature Research [guidelines for submitting code & software](#) for further information.

### Data

Policy information about [availability of data](#)

All manuscripts must include a [data availability statement](#). This statement should provide the following information, where applicable:

- Accession codes, unique identifiers, or web links for publicly available datasets
- A list of figures that have associated raw data
- A description of any restrictions on data availability

Data Availability: Atomic coordinates for the atomic model have being deposited in the Protein Data Bank under the accession numbers 6OHT (EBP-U188666A) and 6OHU (EBP-tamoxifen).

### Field-specific reporting

Please select the one below that is the best fit for your research. If you are not sure, read the appropriate sections before making your selection.

- Life sciences
- Behavioural & social sciences
- Ecological, evolutionary & environmental sciences

## Life sciences study design

All studies must disclose on these points even when the disclosure is negative.

|                 |                                                                                                                            |
|-----------------|----------------------------------------------------------------------------------------------------------------------------|
| Sample size     | No statistical method was used to determine sample size.                                                                   |
| Data exclusions | No data was excluded.                                                                                                      |
| Replication     | Each experiment was reproduced at least three times on separate occasions. Experimental findings were reliably reproduced. |
| Randomization   | The study did not involve animals or human research participants thus samples were not randomized for the experiments.     |
| Blinding        | The study did not involve animals or human research participants thus thus no blinding was used.                           |

## Reporting for specific materials, systems and methods

We require information from authors about some types of materials, experimental systems and methods used in many studies. Here, indicate whether each material, system or method listed is relevant to your study. If you are not sure if a list item applies to your research, read the appropriate section before selecting a response.

### Materials & experimental systems

| n/a                                 | Involvement in the study                                  |
|-------------------------------------|-----------------------------------------------------------|
| <input type="checkbox"/>            | <input checked="" type="checkbox"/> Antibodies            |
| <input type="checkbox"/>            | <input checked="" type="checkbox"/> Eukaryotic cell lines |
| <input checked="" type="checkbox"/> | <input type="checkbox"/> Palaeontology                    |
| <input checked="" type="checkbox"/> | <input type="checkbox"/> Animals and other organisms      |
| <input checked="" type="checkbox"/> | <input type="checkbox"/> Human research participants      |
| <input checked="" type="checkbox"/> | <input type="checkbox"/> Clinical data                    |

### Methods

| n/a                                 | Involvement in the study                        |
|-------------------------------------|-------------------------------------------------|
| <input checked="" type="checkbox"/> | <input type="checkbox"/> ChIP-seq               |
| <input checked="" type="checkbox"/> | <input type="checkbox"/> Flow cytometry         |
| <input checked="" type="checkbox"/> | <input type="checkbox"/> MRI-based neuroimaging |

## Antibodies

|                 |                                                                                                                                                                                                                                                                   |
|-----------------|-------------------------------------------------------------------------------------------------------------------------------------------------------------------------------------------------------------------------------------------------------------------|
| Antibodies used | anti-His (Millipore, 05-949), anti-Strep antibody (Abcam, ab76950)                                                                                                                                                                                                |
| Validation      | anti-His: Routinely evaluated by western blot and immunocytochemistry on transfected HeLa cells. Western Blot Analysis: 0.5-2 µg/mL of this lot detected His tagged Akt1/PKBα in RIPA lysates of transfected HeLa cells.<br>anti-Strep: Evaluated by western blot |

## Eukaryotic cell lines

Policy information about [cell lines](#)

|                                                                   |                                                                                                                                  |
|-------------------------------------------------------------------|----------------------------------------------------------------------------------------------------------------------------------|
| Cell line source(s)                                               | The protein was expressed from HEK-293S GnTI- (ATCC). For the isomerase functional assay, the yeast was obtained from Euroscarf. |
| Authentication                                                    | No further authentication was performed for commercially available cell lines.                                                   |
| Mycoplasma contamination                                          | periodically test negative                                                                                                       |
| Commonly misidentified lines (See <a href="#">ICLAC</a> register) | None of the cell lines used is listed in the database of commonly misidentified cell lines maintained by ICLAC.                  |
